# Supplementary material for: Uncovering the Antibacterial Potential of a Peptide-Rich Extract of Edible Bird’s Nest against Staphylococcus aureus
Source: PubMed Central journal article supplement (PMC11380515; doi:10.4014/jmb.2402.02052), 2024-07-12
Supplement: jmb-34-8-1680-supple.pdf [file jmb-34-8-1680-supple.pdf]

## Supplementary Figure

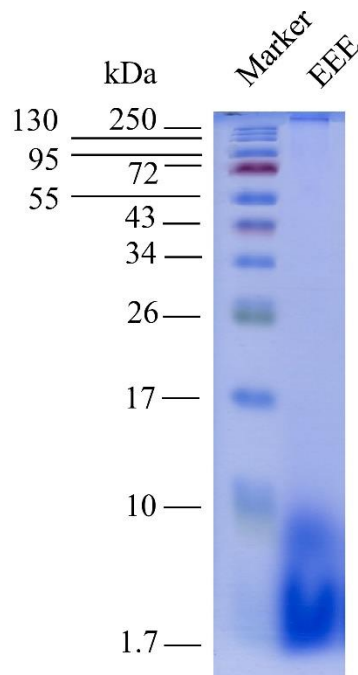

**Fig. S1. SDS-PAGE electropherogram of proteins and peptides in the EEE.**
